# Supplementary material
Source: publisher site journal article supplement (https://www.dovepress.com/article/277620)
Supplement: Supplementary file 1 [file get_supplementary_file.php]

Supplementary materials

The boxplots for the other 13 substitution models


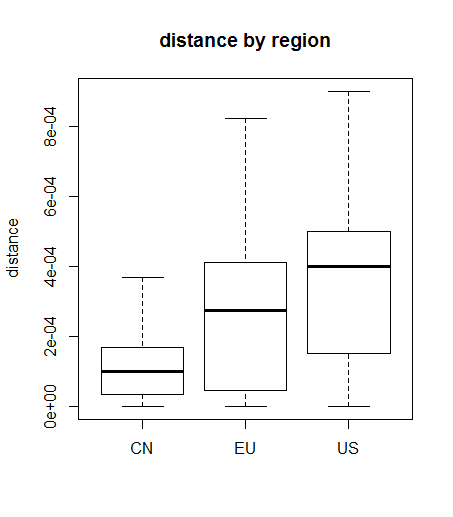


Figure S1. The boxplot of “raw” model


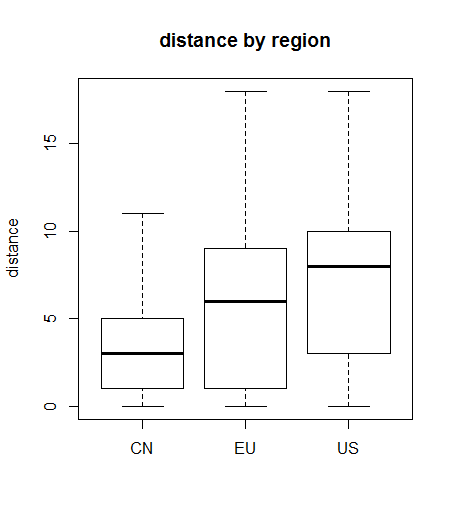


Figure S2. The boxplot of “N” model


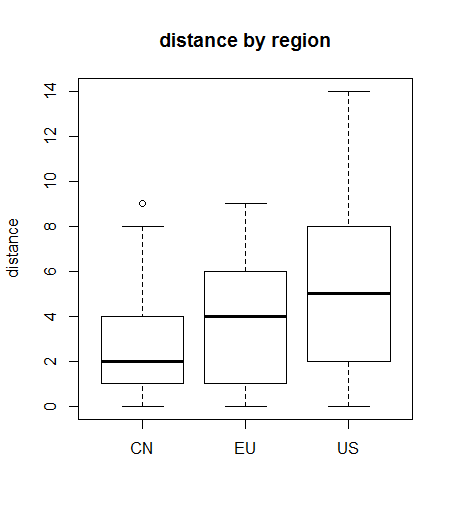


Figure S3. The boxplot of “TS” model


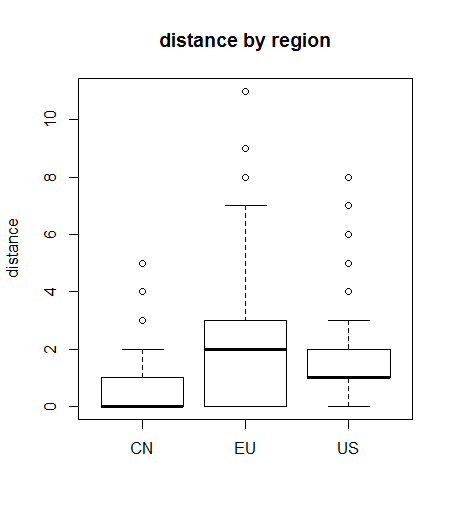


Figure S4. The boxplot of “TV” model


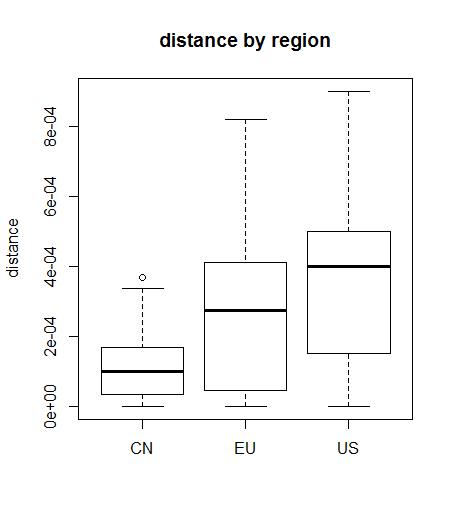


Figure S5. The boxplot of “K80” model


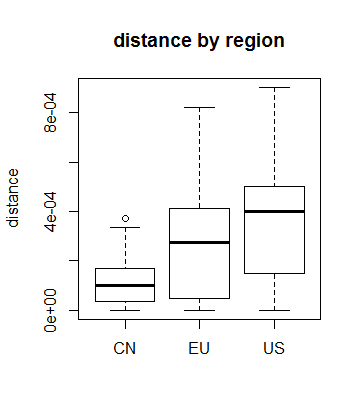


Figure S6. The boxplot of “F81” model


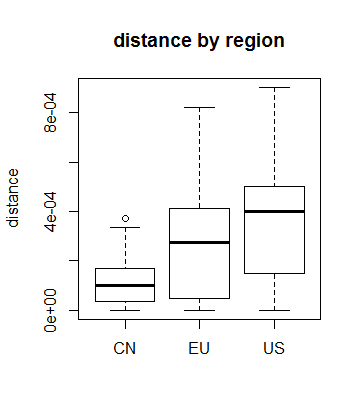


Figure S7. The boxplot of “K81” model


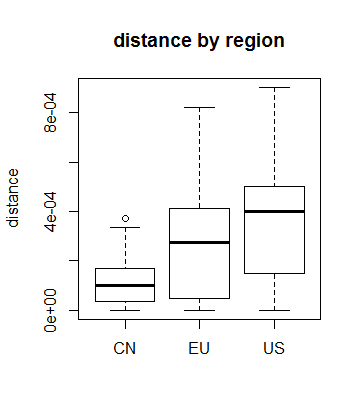


Figure S8. The boxplot of “F84” model


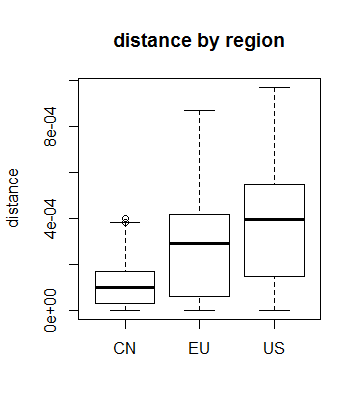


Figure S9. The boxplot of “BH87” model


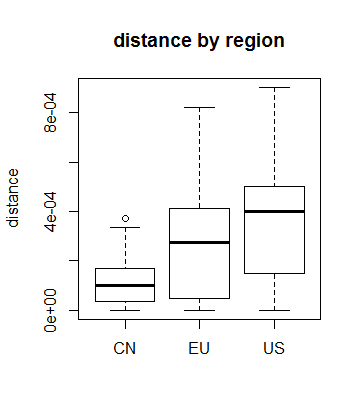


Figure S10. The boxplot of “T92” model


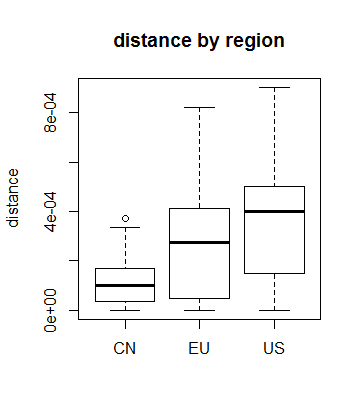


Figure S11. The boxplot of “TN93” model


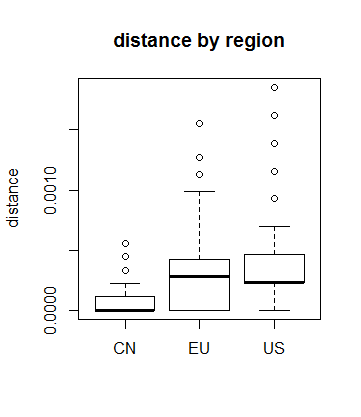


Figure S12. The boxplot of “GG95” model


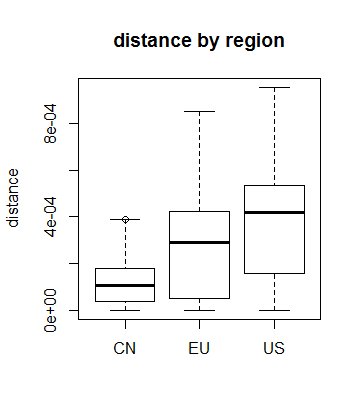


Figure S13. The boxplot of “paralin” model

The IDs of the COVID-19 sequences

China (50 sequences):

MT253696

MT253702

MT291833

MT259231

MT253701

MT123290

MT093631

MT253706

MT123291

MT259230

MT253704

MT226610

MT259226

MT291829

MT121215

MN908947

MT259228

MT039873

MT253699

MN996530

MT135044

MT253703

MT135043

MT253705

MT019533

MN975262

MT253707

MT291830

NC_045512

MT019529

MT291835

MN996531

MT253697

MT291832

MT253710

MN988668

MN988669

MT291828

MT135042

MT019531

MT135041

MT396241

MT291831

LR757998

MT291834

MN996529

MT291826

MT259229

LR757995

MT281577

Europe (43 sequences):

MT292582

MT292580

MT292581

MT198651

MT292579

MT394864

MT233520

MT198653

MT371568

MT233522

MT371569

MT328034

MT292573

MT233523

MT292571

MT233519

MT292574

MT198652

MT093571

MT020781

MT066156

MT292572

MT077125

MT292570

MT359866

MT328032

MT328035

MT328033

MT371574

MT371573

MT371571

MT371572

MT371570

MT320538

MT359865

MT292569

MT292575

MT292578

MT233521

MT292576

MT292577

MT256918

MT256917

USA(50 sequences)

MT412137

MT308695

MT345826

MT325593

MT370951

MT325589

MT370848

MT326072

MT334530

MT325567

MT326028

MT252800

MT252804

MT371020

MT246484

MT412211

MT246466

MT370998

MT371022

MT325604

MT375428

MT358675

MT304487

MT412140

MT371003

MT370841

MT252696

MT276323

MT370844

MT412139

MT370901

MT334539

MT246452

MT263433

MT370992

MT358739

MT326166

MT246464

MT419848

MT385441

MT259282

MT370965

MT308694

MT259237

MT326080

MT334572

MT370931

MT326093

MT293206

MT259256

R code:

(The R code for our sequence-distance analysis is given below, which is also available from the publicly accessible website https://reurl.cc/GrA5dd.)

if (!requireNamespace("BiocManager", quietly = TRUE))

install.packages("BiocManager")

BiocManager::install("Biostrings")

library("Biostrings")

#install.packages("seqinr")

#install.packages("ape")

library(seqinr)

library(ape)

# sa<-read.csv('D:/covid19/dist/ASN_USA.csv',header=T)

# sid<-sample(nrow(sa),50)

# sa1<-sa[sid,]

# write.table(sa1,'D:/covid19/dist/sa_USA.txt',row.names=FALSE,sep="\t", quote = FALSE)

#

# sa_c<-read.csv('D:/covid19/dist/ASN_CN.csv',header=T)

# sid_c<-sample(nrow(sa_c),50)

# sa1_c<-sa_c[sid_c,]

# write.table(sa1_c,'D:/covid19/dist/sa_CN.txt',row.names=FALSE,sep="\t", quote = FALSE)

align_usa<-read.alignment("D:/covid19/dist/usa_aln.fasta","fasta")

dis_usa <- dist.alignment(align_usa, "identity")

mean(dis_usa)

sd(dis_usa)

quantile(dis_usa)

align_cn<-read.alignment("D:/covid19/dist/cn_aln.fasta","fasta")

dis_cn <- dist.alignment(align_cn, "identity")

mean(dis_cn)

sd(dis_cn)

quantile(dis_cn)

align_eu<-read.alignment("D:/covid19/dist/eu_aln.fasta","fasta")

# sa_eu_nam<-align_eu$nam

# sa_eu_nam<-substr(sa_eu_nam,4,nchar(sa_eu_nam))

# sa_eu<-sub("\\..*","",sa_eu_nam)

# write.table(sa_eu,'D:/covid19/dist/sa_eu.txt',row.names=FALSE,sep="\t", quote = FALSE)

dis_eu <- dist.alignment(align_eu, "identity")

mean(dis_eu)

sd(dis_eu)

quantile(dis_eu)

region<-c("US","CN","EU")

#boxplot(dis_usa,dis_cn,dis_eu,names=region,ylab="distance",main="distance by region")

m_cn<-as.matrix(dis_cn)

ndx=order(m_cn,decreasing = T)[1:18]

lapply(ndx,function(x){return(which(m_cn==m_cn[x],arr.ind=T))})

m_cn[ndx]

align_cn1<-read.alignment("D:/covid19/dist/cn1_aln.fasta","fasta")

dis_cn1 <- dist.alignment(align_cn1, "identity")

mean(dis_cn1)

sd(dis_cn1)

quantile(dis_cn1)

boxplot(dis_usa,dis_cn1,dis_eu,names=region,ylab="distance",main="distance by region")

mod<-"indelblock" #"indel" #"paralin" #"logdet" #"TN93" #T92" #"BH87" #"F84" #"K81" #"F81" #"K80" #"JC69" # "TV" #"TS" #"N" #"raw"

dis_usa <- dist.dna(as.DNAbin(align_usa), model=mod)

dis_eu <- dist.dna(as.DNAbin(align_eu), model=mod)

dis_cn1 <- dist.dna(as.DNAbin(align_cn1), model=mod)

yy<-c(dis_usa,dis_cn1,dis_eu)

xx<-c(rep("US",length(dis_usa)),rep("CN",length(dis_cn1)),rep("EU",length(dis_eu)))

tapply(yy,xx,mean)

tapply(yy,xx,sd)

tapply(yy,xx,quantile)

anova(lm(yy~xx))

pairwise.t.test(yy, xx, p.adj = "bonf")

boxplot(yy~xx,ylab="distance",xlab="",main="distance by region")
